# Supplementary material for: Layered MoS2nanoparticles on TiO2nanotubes by a photocatalytic strategy for use as high-performance electrocatalysts in hydrogen evolution reactions
Source: Royal Society of Chemistry journal article supplement (doi:10.1039/c5gc00272a), 2015-01-01
Supplement: c5gc00272a1.pdf [file c5gc00272a1.pdf]

## Electronic Supplementary Information (ESI)

### Experimental Section

*Fabrication of TiO<sub>2</sub> Nanotubes (TiO<sub>2</sub>-NTs):* TiO<sub>2</sub>-NTs were prepared by an electrochemical anodization in fluoride-contained electrolyte. Typically, smooth Ti sheets (Aldrich) with a geometric size of 1×2.5 cm<sup>2</sup> was anodized at a constant voltage of 20 V for 20 min in 0.5% HF aqueous solution. A Pt foil with a size of 2×2 cm<sup>2</sup> was used as a cathode. The anodized Ti sheets were then washed with deionized water and dried in the air spontaneously, which was followed by annealed at 450 °C for 3 h to realize anatase crystallization of TiO<sub>2</sub> nanotubes. TiO<sub>2</sub>-NTs formed on smooth Ti sheet were denoted as S-TiO<sub>2</sub>-NTs. In order to obtain hierarchical TiO<sub>2</sub>-NTs, porous Ti sheet (1×2.5 cm<sup>2</sup>) made of irregular microscale Ti particles (Baoji Jinkai Co., Ltd, China) was anodized at a constant voltage of 30 V for 20 min in 0.5% HF aqueous solution. The anatase crystallization of TiO<sub>2</sub> nanotubes was realized by calcination at 450 °C. The resulting TiO<sub>2</sub>-NTs were denoted as H-TiO<sub>2</sub>-NTs.

*Synthesis of MoS<sub>2</sub> Nanoparticles on TiO<sub>2</sub>-NTs by Photocatalysis:* Layered MoS<sub>2</sub> nanoparticles were deposited directly on TiO<sub>2</sub>-NTs by photocatalytic reduction of (NH<sub>4</sub>)<sub>2</sub>MoS<sub>4</sub> precursor. S-TiO<sub>2</sub>-NTs or H-TiO<sub>2</sub>-NTs were placed in 15mL of (NH<sub>4</sub>)<sub>2</sub>MoS<sub>4</sub> precursor in H<sub>2</sub>O/C<sub>2</sub>H<sub>5</sub>OH mixed solvent with volume ratio of 9:1. Before photocatalytic reaction, the precursor solution was deaerated with N<sub>2</sub> for 30 min, and then TiO<sub>2</sub>-NTs was irradiated with 10 mW/cm<sup>2</sup> of 365-nm ultraviolet (UV) light from a high-pressure mercury lamp. The irradiated TiO<sub>2</sub>-NTs were washed with deionized water and dried with N<sub>2</sub> airflow. The resulting MoS<sub>2</sub> nanoparticles on TiO<sub>2</sub>-NTs could be used as an electrode for HER directly.

*Electrocatalytic Activity for Hydrogen Evolution Reaction (HER):* The electrocatalytic activities of MoS<sub>2</sub> nanoparticulate electrode were evaluated by measuring the polarization curves in 0.5 M H<sub>2</sub>SO<sub>4</sub> electrolyte using a three-electrode configuration. The Tafel curves were calculated from the polarization curves by subtracting the background current. The MoS<sub>2</sub> electrode with a geometric area of 1 cm<sup>2</sup> was used for a working electrode and a Pt wire acted as a counter electrode. The reference electrode was Ag/AgCl electrode in 3.5 M KCl solution ( $\phi=0.205$  V vs. Standard Hydrogen Electrode, SHE). The potential was supplied by a CHI660D electrochemical workstation (Shanghai Chenhua Apparatus Co., China), which were calibrated to be against SHE based on an equation of  $\phi$  (V vs. SHE) =  $\phi$  (V vs. Ag/AgCl)+0.205 V. The scanning rate was fixed to be 5 mV/s for the measurements.

*Characterizations:* The morphologies of TiO<sub>2</sub>-NTs and MoS<sub>2</sub> nanoparticles were characterized using a field emission scanning electron microscope (SEM, JSM-7500F) at 20 kV. The surface chemical compositions were studied using an X-ray photoelectron spectroscopy (XPS) measurement (PHI Quantera). High resolution morphologies of MoS<sub>2</sub> nanoparticles were obtained using a transmission electron microscope (TEM, JEOL JEM-3000F) at 300 kV. In this case, TiO<sub>2</sub>-NTs were prepared by anodization of Ti foil at 60 V for 30 min in ethylene glycol (Beijing Chemical Factory, China) consisting of 0.25 wt % ammonium fluoride (Beijing Chemical Factory, China) and 2 vol% Milli-Q water. After MoS<sub>2</sub> deposition, TiO<sub>2</sub>-NTs were scraped from Ti foil for TEM measurements.

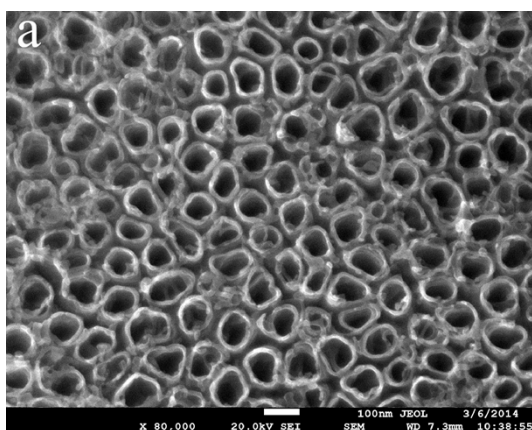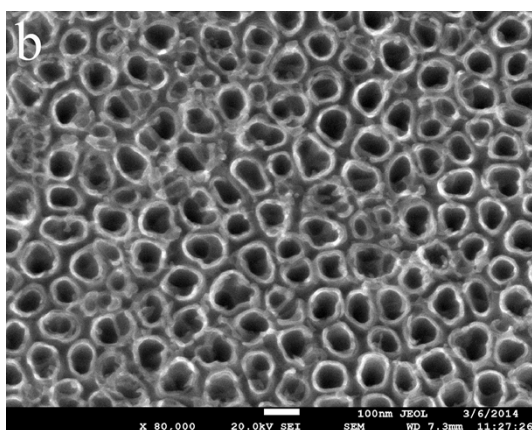

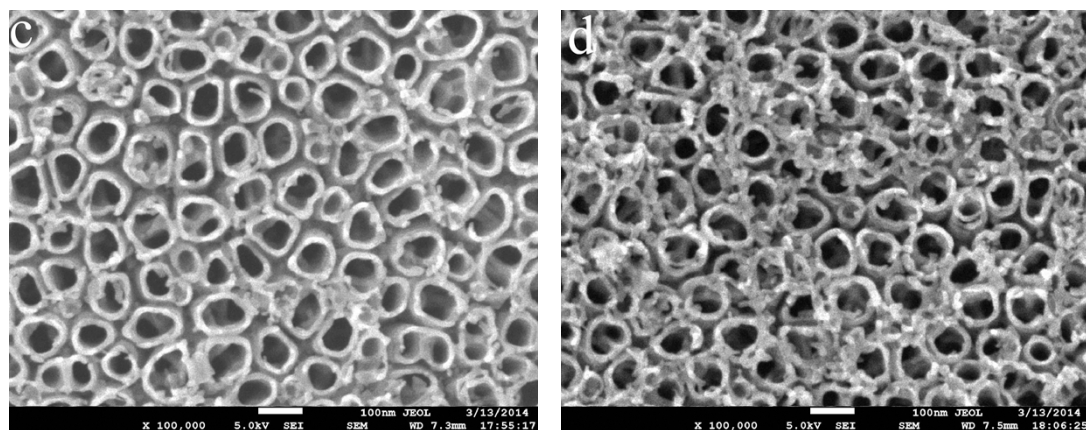

**Figure S1.** High-resolution SEM images of TiO<sub>2</sub>-NTs before (a) and after photocatalytic reaction for 1 h (b), 4 h (c) and 8 h (d).
